# Supplementary material for: Imaging biofilm-encased microorganisms using carbon dots derived from L. plantarum
Source: Royal Society of Chemistry journal article supplement (doi:10.1039/c7nr01975k), 2017-01-01
Supplement: c7nr01975k1.pdf [file c7nr01975k1.pdf]

**Imaging biofilm-encased microorganisms using carbon dots derived from *L. plantarum***

Fengming Lin,<sup>†,\*</sup> Chengcheng Li,<sup>†</sup> Li Dong,<sup>†</sup> Degang Fu,<sup>†</sup> and Zhan Chen<sup>‡,\*</sup>

<sup>†</sup>*State Key Laboratory of Bioelectronics, School of Biological Science and Medical Engineering, Southeast University, Nanjing 210096, China*

<sup>‡</sup>*Department of Chemistry, University of Michigan, 930 North University Avenue, Ann Arbor, MI 48109, United States*

\*E-mail: [linfengming@seu.edu.cn](mailto:linfengming@seu.edu.cn); [zhanc@umich.edu](mailto:zhanc@umich.edu).

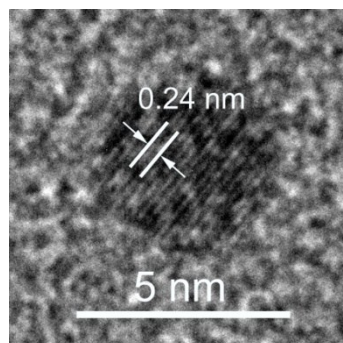

Figure S1 The high-resolution TEM image of CDs-605.

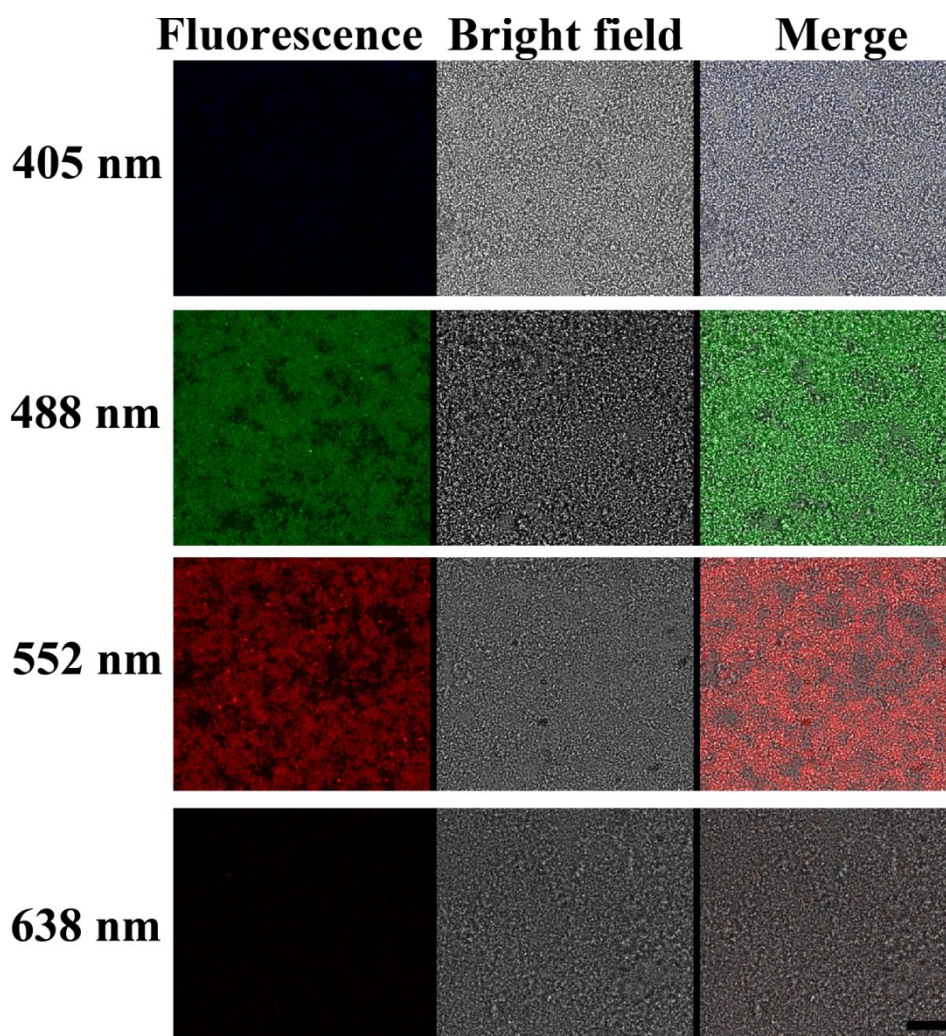

Figure S2 Confocal fluorescence images of *E. coli* biofilm with different excitation lengths. *E. coli* biofilm grown on day5 was stained with CDs-605 and was checked in all four channels with different colors including blue, green and red when excited at 405, 488, 552 and 638 nm.
